# Supplementary material for: Long Term Homogeneity, Trend and Change-Point Analysis of Rainfall in the Arid District of Ananthapuramu, Andhra Pradesh State, India
Source: Preprints.org preprint supplement (doi:10.20944/preprints201912.0226.v1), 2019-12-17
Supplement: Supplementary file 3 [file supplementary]

## Sheet: Serial-Correlation-Test-Results
Station name	90% Confidence Interval	95% Confidence Interval	99% Confidence Interval
Amadaguru	August	August	-
Anantapur	-	-	-
Atmakur	-	-	-
Brahmasamudram	June	June	-
Bukkapatnam	-	-	-
Chennekottapalle	May	May	-
Dharmavaram	May, North-East Monsoon	North-East Monsoon	-
Gooty	October	October	October
Guntakal	-	-	-
Hindupur	February, May, June, Winter	February, May	-
Kadiri	-	-	-
Kalyanadurg	Summer	-	-
Kanaganapalle	-	-	-
Kanekal	Annual	-	-
Kudair	-	-	-
Madakasira	-	-	-
Mudigubba	May, North-East Monsoon	May, North-East Monsoon	North-East Monsoon
Pedapappuru	November	November	-
Penukonda	Annual, Soth-Wast Monsoon	-	-
Puttaparthi	Annual, North-East Monsoon	Annual	-
Rayadurg	-	-	-
Rolla	-	-	-
Singanamala	May	-	-
Tadimarri	October, North-East Monsoon	October	-
Tadipatri	November	-	-
Tanakal	-	-	-
Uravakonda	May, Ocrober, Annual	Annual	-

## Sheet: MK and SRC-Total Rainfall
Mann-Kendall, Sen's Slope and Spearman's Rho Test Results for Total Rainfall Series
Number	Stations	JAN			FEB			MAR			APR			MAY			JUN			JUL			AUG			SEP			OCT			NOV			DEC			ANN			WINT			SUMM			SWM
		MK	SS	SRC	MK	SS	SRC	MK	SS	SRC	MK	SS	SRC	MK	SS	SRC	MK	SS	SRC	MK	SS	SRC	MK	SS	SRC	MK	SS	SRC	MK	SS	SRC	MK	SS	SRC	MK	SS	SRC	MK	SS	SRC	MK	SS	SRC	MK	SS	SRC	MK	SS	SRC
1	Amadaguru	0.731482	0	1.46079	1.15967	0	1.92418	1.19535	0	1.52514	-0.392503	0	-0.241075	1.60569	1.71579	1.68989	0.33898	0.388889	0.661456	0	0	-0.0268195	-0.677959	-0.670588	-0.793253	-1.03478	-2	-1.05889	-1.26671	-1.86667	-1.23449	1.07046	0.786875	1.19529	1.01694	0	1.20993	-1.07046	-3.67368	-1.11982	0.945575	0	1.46224	0.945575	1.41667	1.01023	-0.856369	-2.55238	-0.83712
2	Anantapur	0.14983	0	0.218551	1.47106	0	2.7026	-0.29966	0	-0.484631	0.585698	0	0.520242	1.26674	1.33333	1.26795	0.667424	0.3875	0.512395	-0.422248	-0.374615	-0.247104	1.10329	0.904167	1.34826	-0.844495	-1.31473	-0.819097	0.585698	0.872333	0.517375	-0.395006	-0.1	-0.268779	-1.02157	0	-1.15103	0.14983	0.34883	0.307336	1.15778	0	1.47321	1.70261	1.8245	1.74981	-0.476731	-1.254	-0.338224
3	Atmakur	0.231555	0	0.549579	1.2395	0	2.42453	1.06243	0	1.48768	2.71056	0.500702	2.8106	2.65607	1.47721	2.68063	1.38933	0.669444	1.44641	1.14416	0.453226	1.31222	1.74347	0.990556	1.82892	0.776391	1.16571	0.659459	1.44381	1.25072	1.60367	0.286039	0	0.560055	0.163451	0	0.295015	2.68332	6.57281	2.8556	1.08967	0	1.72377	3.43247	2.47083	3.28836	2.11124	3.44245	2.36448
4	Brahmasamudram	0	0	0.0428314	0.642277	0	0.971567	0.945575	0	1.61632	-0.267615	0	-0.226386	0.749323	0.733333	0.830223	-0.124887	-0.0352941	-0.127205	-0.410344	-0.4	-0.482645	-0.642277	-0.540909	-0.649469	-1.3024	-2.3	-1.39023	-1.53433	-2.86667	-1.57067	-0.017841	0	0.108058	0.214092	0	0.357243	-1.53433	-5.90588	-1.62184	0.535231	0	0.801283	0.999098	1.12857	1.2441	-1.28455	-4.44737	-1.17099
5	Bukkapatnam	0.0544836	0	0.069427	0.0408627	0	0.113737	0.898979	0	1.32981	0.476731	0	0.38685	1.30761	0.766167	1.6769	1.33485	0.775494	1.08306	-0.367764	-0.3728	-0.45251	0.177072	0.366234	0.149807	-0.408627	-0.701389	-0.423634	-0.667424	-0.902857	-0.72278	0	0	0.15684	0.0272418	0	0.119961	0.14983	0.583342	0.172973	0.14983	0	0.294858	1.26674	0.973932	1.56911	-0.0136209	-0.0731527	0.11583
6	Chennekottapalle	0.640182	0	1.17876	1.25312	0	2.19284	0.667424	0	0.888492	0.953463	0	1.02749	0.313281	0.0830144	0.385803	-0.776391	-0.362667	-0.900341	0.29966	0.118333	0.265864	0.735528	0.3875	0.883405	-1.53916	-1.43513	-1.45483	-1.21226	-0.9475	-1.35907	-0.395006	-0.107108	-0.390746	0.313281	0	0.577319	-0.898979	-2.01859	-0.799025	1.53916	0	2.13057	0.844495	0.495455	0.74594	-0.340522	-0.729412	-0.277992
7	Dharmavaram	0.0136209	0	0.0101099	0.0817254	0	0.0522355	0.326901	0	0.517936	1.34847	0.118824	1.36155	0.708286	0.401007	0.760187	-0.46311	-0.359509	-0.567364	-0.108967	-0.130769	-0.0672163	0.844495	0.71947	0.980279	-0.694666	-1.00343	-0.857143	-0.14983	-0.254091	-0.240927	-0.204313	-0.0784615	-0.0934367	0.0681045	0	0.401797	0	-0.102451	-0.0772201	0.503973	0	0.55388	1.1714	1.02963	1.21341	-0.313281	-0.826515	-0.171429
8	Gooty	0	0	0.0160611	-0.14983	0	-0.240111	0.721907	0	0.785202	2.92849	1.01866	2.81993	0.939842	0.396897	1.13205	1.43019	0.61	1.5305	-0.0408627	-0.0435606	-0.273359	0.708286	0.603431	0.770284	-0.967083	-1.56852	-0.979151	0.286039	0.476379	0.247104	-0.694666	-0.223214	-0.565772	0.790012	0	1.11065	-0.217934	-0.71125	-0.178747	0.163451	0	0.317595	2.43814	1.81053	2.67336	-1.02157	-2.05111	-0.843243
9	Guntakal	0.871737	0	1.60583	0.408627	0	0.680384	1.4983	0	1.79373	2.75142	0.738095	2.7101	2.57435	1.76148	2.72002	0.953463	0.452256	1.08484	1.07605	0.745	1.09387	1.04881	0.812522	1.14903	-0.858116	-1.16	-0.911197	0.61294	0.641429	0.804633	-0.258797	0	-0.226833	-0.0681045	0	-0.0158724	1.83882	4.8046	1.82239	1.13053	0	1.64245	3.52781	3.23701	3.64828	0.61294	1.12318	0.665637
10	Hindupur	0.340522	0	0.586376	0.367764	0	0.568966	0.844495	0	1.33549	0.531215	0.015	0.334615	1.41657	1.14167	1.53791	0.653803	0.403678	0.925513	-0.0953463	-0.0393103	0.0432432	-0.44949	-0.652708	-0.483398	-1.34847	-2.23015	-1.37297	-0.190693	-0.173515	-0.121174	-0.190693	-0.138542	-0.0161458	-0.830875	0	-0.950627	-0.204313	-0.675	-0.271815	0.790012	0	1.12351	1.5664	1.4895	1.61636	-0.817254	-2.29854	-0.77293
11	Kadiri	-0.490352	0	-0.820822	0.0953463	0	0.188027	0.776391	0	0.768669	1.40295	0.0985185	1.56058	0.640182	0.369071	0.910254	-0.476731	-0.4	-0.381432	-0.231555	-0.257738	-0.335135	-0.177072	-0.22	-0.294981	-1.00795	-1.37254	-1.03622	-0.503973	-0.666667	-0.467954	0.435869	0.272464	0.578734	-0.286039	0	-0.208713	-0.258797	-0.776471	-0.202317	-0.0136209	0	-0.0411127	1.44381	1.24318	1.72852	-0.286039	-1.11825	-0.535907
12	Kalyanadurg	-0.0544836	0	-0.152368	0.286039	0	0.658812	0.803633	0	1.2234	1.29398	0	0.983818	1.26674	1.28013	1.49686	1.33485	0.735088	1.27859	0.490352	0.340303	0.639106	1.40295	1.34588	1.49653	-0.9126	-1.5	-0.928185	-0.231555	-0.243981	-0.0679537	0.735528	0.0653333	0.856391	-0.626561	0	-0.646425	1.07605	3.32222	1.21544	0.395006	0	0.729179	2.19296	2.30429	2.62085	0.476731	0.855429	0.633205
13	Kanaganapalle	0.667424	0	1.22902	0.258797	0	0.563491	1.21226	0	1.45379	2.05676	0.0480769	2.43736	1.43019	0.971429	1.44525	-0.245176	-0.0677945	-0.320337	-0.708286	-0.369444	-0.555844	0.980704	0.582308	1.05298	-0.286039	-0.555	-0.376834	0	-0.0037037	0.234749	-0.544836	-0.193254	-0.353069	-0.0544836	0	0.19942	0.0408627	0.123833	0.236293	1.02157	0	1.39433	2.27469	2.02298	2.3514	-0.231555	-0.577564	-0.202317
14	Kanekal	-0.136209	0	-0.183155	-0.0544836	0	-0.18777	0.61294	0	0.899845	0.871737	0.0775	0.965374	0.735528	0.605243	0.94645	0.286039	0.170905	0.145174	0.395006	0.314145	0.55444	1.02157	0.716964	1.06718	-0.46311	-0.637917	-0.533181	0.272418	0.175968	0.141532	0.490352	0.0666667	0.583674	-1.41657	0	-1.67271	-0.0136209	-0.0479167	0.03861	0.0953463	0	0.231265	1.59364	1.50426	1.82857	0.231555	0.758333	0.282625
15	Kudair	0.776391	0	1.67604	1.21226	0	2.3758	1.60727	0	2.27295	1.81158	0	1.94327	1.96141	1.04643	1.94868	0.817254	0.292297	0.9116	0.653803	0.279167	0.628148	2.58797	1.69365	2.72881	-0.367764	-0.312821	-0.396911	0.354143	0.299519	0.625518	0.29966	0	0.39355	-0.0544836	0	-0.16867	1.70261	4.28476	1.94749	1.55278	0	2.52516	3.05108	2.21929	2.95721	0.476731	0.941667	0.572973
16	Madakasira	0.490352	0	0.871378	0.163451	0	0.34449	0.558457	0	0.644847	1.81158	0.650311	1.87573	0.653803	0.487706	0.801907	-0.503973	-0.358365	-0.464624	0.435869	0.153947	0.394494	-0.395006	-0.390966	-0.342857	-1.43019	-2.13782	-1.36988	0.231555	0.273333	0.600772	0.490352	0.129762	0.4912	-0.803633	0	-0.851611	-0.14983	-0.296154	-0.186873	0.790012	0	1.24266	1.5664	1.72593	1.63552	-0.422248	-0.950476	-0.580695
17	Mudigubba	0.285456	0	0.707537	0.642277	0	1.08272	0.606595	0	0.949937	0.0535231	0	0.21388	0.677959	0.545455	0.726366	0.392503	0.229167	0.477937	-0.356821	-0.7	-0.456943	-0.428185	-0.96	-0.547113	-0.6958	-1.1	-1.02158	-0.856369	-1.1087	-1.01746	0	0	0.00353287	1.87331	0	2.48902	-0.963416	-4.74	-0.949223	0.553072	0	0.783429	0.321139	0.25	0.300973	-1.21319	-4.0875	-0.973594
18	Pedapappuru	0.0535231	0	-0.0038216	0.963416	0	2.36587	1.28455	0	2.03543	0.945575	0	1.17873	0.249774	0.0521739	0.273588	-0.642277	-0.356522	-0.647032	0.17841	0.216667	0.305319	-0.713641	-1.28571	-0.683587	-1.89115	-2.4	-1.85824	-1.51649	-2.51875	-1.397	-0.231933	0	-0.145009	0.767164	0	1.13296	-2.03388	-7.64833	-2.0532	0.51739	0	0.632523	0.51739	0.447059	0.655931	-1.81979	-4.75	-1.82655
19	Penukonda	0.503973	0	0.851762	0.572078	0	0.799705	0.544836	0	0.848192	1.63451	0.368826	1.75341	0.844495	0.714107	0.93452	-0.0681045	-0.0385714	-0.126641	0.395006	0.4	0.277992	1.02157	0.790423	1.03938	-1.33485	-2.67137	-1.33549	0.749149	0.965455	1.03166	0.0817254	0.021978	0.0869685	0.258797	0	0.299803	0.844495	2.63277	0.879128	1.13053	0	1.51432	1.86606	1.90093	2.07963	-0.286039	-1.10909	-0.27027
20	Puttaparthi	0.142728	0	0.350553	0.570913	0	1.03282	0.285456	0	0.541792	1.3916	0	1.52374	1.19535	1.28	1.32918	0.802846	0.696	0.846587	0.392503	0.36	0.34484	-0.785005	-0.885714	-1.00771	-0.499549	-1.1625	-0.605602	-1.14183	-1.975	-1.22948	0.0713641	0	0.286162	0.51739	0	0.663972	-0.321139	-1.115	-0.422825	0.570913	0	0.887168	1.65922	1.7625	1.71613	-0.285456	-1.4125	-0.269292
21	Rayadurg	0.0272418	0	0.102487	0.231555	0	0.405104	-0.44949	0	-0.603537	0.76277	0.0899038	0.997665	1.47106	1.07333	1.8002	1.59364	0.80825	1.62008	-0.0681045	-0.0683333	-0.0432432	1.13053	0.951875	1.13977	-1.40295	-2.03492	-1.46409	-0.422248	-0.366818	-0.188417	0.572078	0.146875	0.814948	-1.03519	0	-1.3414	0.667424	2.20054	0.662548	0.313281	0	0.511816	1.98865	2.14462	2.08801	-0.0817254	-0.20731	-0.0778524
22	Rolla	0.0892052	0	0.198377	-0.142728	0	-0.281489	0.249774	0	0.201574	0.535231	0	0.459229	-0.33898	-0.408421	-0.368431	-0.107046	-0.145455	-0.0134037	0.303298	0.225	0.35181	-0.749323	-0.936842	-0.79569	-0.892052	-1.36471	-0.853777	-1.17751	-2.38182	-1.33184	-0.731482	-0.294737	-0.810642	-0.231933	0	-0.0629771	-1.60569	-7.13478	-1.68764	-0.0535231	0	-0.0611457	0.17841	0.24	0.335092	-0.820687	-3.93333	-0.878549
23	Singanamala	0.939842	0	1.32962	0.667424	0	1.30821	0.803633	0	1.1052	1.18502	0.0439614	1.21384	-0.44949	-0.19329	-0.47884	-0.340522	-0.244792	-0.426255	-0.14983	-0.159412	-0.0942085	0.476731	0.458333	0.576062	-1.33485	-1.75417	-1.26491	-1.94779	-1.72	-1.72201	-0.531215	-0.0411253	-0.28589	-0.313281	0	-0.328751	-2.30193	-5.86308	-2.261	1.15778	0	1.46507	0	-0.00526316	-0.0407489	-1.10329	-2.42917	-1.03166
24	Tadimarri	0.499549	0	1.70389	0.892052	0	1.50162	-0.107046	0	-0.0356329	1.96251	0.172727	2.3488	0.677959	0.311111	1.10953	1.23103	1.05	1.08844	0.945575	1	0.796522	0.124887	0.0833333	0.188917	-0.107046	-0.316667	-0.305847	-0.909893	-0.9625	-0.929264	0.660118	0.2	0.703809	1.28455	0	1.66901	-0.285456	-1.175	-0.264418	1.46296	0	2.17238	0.820687	0.692308	1.03208	-0.0713641	-0.116667	0.00121852
25	Tadipatri	-0.258797	0	-0.505619	0.544836	0	0.903677	-0.61294	0	-0.805551	0.735528	0	0.720088	-0.286039	-0.14375	-0.497324	-1.02157	-0.619615	-1.16448	0.272418	0.233333	0.339061	0.258797	0.419848	0.384556	-0.994325	-1.39521	-0.87722	-1.07605	-1.16696	-1.20463	-0.381385	-0.00357143	-0.202689	0.313281	0	0.455973	-1.34847	-4.09085	-1.38378	0.640182	0	0.852228	0.122588	0.0737143	0.138996	-0.749149	-2.00172	-0.677992
26	Tanakal	0.326901	0	0.574591	0.749149	0	1.18433	0.994325	0	1.39588	1.41657	0.0987854	1.65937	0.354143	0.191379	0.457857	0.61294	0.255	0.720155	-1.15778	-0.855	-1.20079	0.44949	0.478299	0.674903	-0.367764	-0.509524	-0.392278	-0.926221	-1.25652	-0.997695	0.46311	0.277222	0.455197	-0.44949	0	-0.198514	-0.245176	-1.05242	-0.211083	0.9126	0	1.2802	0.640182	0.503814	0.600772	-0.503973	-1.50556	-0.443243
27	Uravakonda	-0.313281	0	-0.410716	1.13053	0	2.18695	-0.408627	0	-0.428108	1.15778	0.186058	1.22531	0.653803	0.433437	0.919737	-0.871737	-0.687077	-0.882183	-0.61294	-0.321368	-0.544085	0.939842	1.05312	0.989961	-1.36209	-1.91667	-1.62295	-0.422248	-0.398462	-0.457143	0	0	0.132072	-0.367764	0	-0.389429	-1.15778	-3.33926	-1.28031	0.61294	0	1.01127	1.81158	1.24067	1.96139	-1.70261	-3.70584	-1.88263
		Siginifact at 90% Confidence Interval
		Siginifact at 95% Confidence Interval
		Siginifact at 99% Confidence Interval
[truncated: 3 more columns]

## Sheet: Modified-Trend-Tests
Modified Trend Tests for Serially Correlated Total Rainfall Series
STATION NAME	MONTH	PW	TFPW	BCPW	MMK-HAMED	MMK-YUE
Amadaguru	August	-0.468952	-0.168823	-0.506468	-1.17149	-2.44913
Brahmasamudram	June	0.543984	0.506468	0.431435	-0.0960016	-0.29788
Chennekothapalle	May	0.0568057	0	0.0852086	0.313533	0.858247
Dharmavaram	May	0.653266	0.482849	0.681669	0.793328	1.85278
Dharmavaram	NE-MONSOON	-0.482849	-0.369237	-0.511252	-0.542861	-1.14903				Siginifact at 90% Confidence Interval
Gooty	October	0.482849	0.284029	0.511252	0.707025	0.691113
Hindupur	February	-0.0631798	-0.0631798	-0.0631798	0.50772	0.883612				Siginifact at 95% Confidence Interval
Hindupur	May	1.9598	1.50535	2.07341	1.41706	3.18825
Hindupur	June	0.170417	0.312431	0.0568057	0.653864	1.16078				Siginifact at 99% Confidence Interval
Hindupur	Winter	0.296532	0.296532	0.296532	1.40437	1.79193
Kalyanadurg	Summer	IH	IH	IH	IH	IH
Kanekal	Annual	0.284029	0.284029	0.482849	-0.0136209	-0.0211553
Mudigubba	May	0.281371	0.131306	0.281371	0.678175	1.67685
Mudigubba	NE-MONSOON	-0.506468	-0.506468	-0.5815	-0.0957578	-0.109708
Pedapappuru	November	-0.0939336	-0.0939336	-0.0939336	-0.2123	-0.49893
Penukonda	Annual	0.710072	1.13611	0.59646	0.844574	1.86613
Penukonda	SW-MONSOON	0	-0.170417	-0.0284029	-0.398375	-0.731583
Puttaparthi	Annual	-0.543984	-0.431435	-0.506468	-0.775472	-1.32135
Puttaparthi	NE-MONSOON	-1.18176	-0.956661	-1.14424	-0.731599	-2.25479
Singanamala	May	-0.127826	-0.227223	-0.184637	-0.638851	-0.923611
Tadimarri	October	-1.7445	-1.44437	-1.85705	-1.63532	-2.44621
Tadimarri	NE-MONSOON	-0.956661	-0.806597	-0.994177	-0.964529	-2.21305
Tadipatri	November	-0.766877	-0.766877	-0.823683	-0.383754	-0.951082
Uravakonda	May	1.73257	1.44855	1.84619	1.6589	1.33222
Uravakonda	October	-0.0852086	-0.0284029	-0.0852086	-0.422248	-0.878168
Uravakonda	Annual	-0.0284029	-0.568057		-0.904979	-2.29848

## Sheet: MK and SRC-No. of Rainy Days
Mann-Kendall, Sen's Slope and Spearman's Rho Test Results for Number of Rainy Days
Number	Stations	JAN			FEB			MAR			APR			MAY			JUN			JUL			AUG			SEP			OCT			NOV			DEC			ANN			WINT			SUMM			SWM
		MK	SS	SRC	MK	SS	SRC	MK	SS	SRC	MK	SS	SRC	MK	SS	SRC	MK	SS	SRC	MK	SS	SRC	MK	SS	SRC	MK	SS	SRC	MK	SS	SRC	MK	SS	SRC	MK	SS	SRC	MK	SS	SRC	MK	SS	SRC	MK	SS	SRC	MK	SS	SRC
1	Amadaguru	0.749323	0	1.51171	0.463867	0	0.780291	0.428185	0	0.523445	0.356821	0	0.419719	1.67706	0.0769231	1.77298	1.76626	0.0714286	1.73436	0.231933	0	0.147792	-0.677959	0	-0.469686	0.785005	0.04	0.869431	-0.51739	0	-0.857332	0.820687	0.0588235	0.869686	0.820687	0	1.0074	1.35592	0.230769	1.25098	1.21319	0	1.61835	1.71274	0.111111	1.71102	0.856369	0.0833333	0.933752
2	Anantapur	-0.108967	0	-0.132105	0.272418	0	0.762246	-0.885358	0	-1.15575	0.885358	0	0.845504	0.163451	0	0.333493	1.13053	0.0416667	1.13345	0.245176	0	0.551251	0.272418	0	0.455242	-1.04881	-0.0513158	-1.20371	-0.0681045	0	-0.12639	-0.490352	0	-0.629923	-0.681045	0	-0.936091	0.435869	0.0364721	0.303026	0.136209	0	0.24186	0.817254	0.0312805	1.06342	0.0681045	0	0.218714
3	Atmakur	0.340522	0	0.910533	0.817254	0	1.76742	0.599319	0	0.889578	2.62883	0.0444664	2.70853	2.87401	0.0923295	2.86713	2.084	0.0625	2.04685	1.55278	0.0555556	1.51447	1.79796	0.0588235	2.05787	-0.177072	0	-0.0230067	1.48468	0.0833333	1.53499	0.776391	0	0.782124	-0.46311	0	-0.624359	3.03746	0.466667	2.85427	1.1714	0	2.01974	3.86833	0.1875	3.54618	1.78434	0.166667	2.04671
4	Brahmasamudram	0.017841	0	0.0620519	0.499549	0	0.888395	0.927734	0	1.60214	0.731482	0	0.73387	-0.267615	0	-0.076365	0.017841	0	-0.3833	0.321139	0	0.262897	-0.463867	0	-0.429777	0.017841	0	0.157005	-2.15876	-0.181818	-2.03042	-0.553072	0	-0.727061	-0.820687	0	-1.28455	-0.588754	-0.1	-0.389201	0.570913	0	0.777593	0.713641	0.0434783	0.886266	0.107046	0	0.0544772
5	Bukkapatnam	-0.29966	0	-0.566123	0.0544836	0	0.125467	1.19864	0	1.40452	0.408627	0	0.541807	1.32123	0	1.25566	1.48468	0.0625	1.27467	-0.844495	0	-0.99196	0.0817254	0	0.200572	-0.558457	0	-0.56463	-0.0272418	0	0.00523399	0.340522	0	0.205049	-0.898979	0	-1.12155	0.245176	0.0185185	0.334623	0.0681045	0	0.102664	1.53916	0.0465368	1.77868	-0.0136209	0	0.125323
6	Chennekottapalle	0.190693	0	0.430006	0.653803	0	1.42218	0.313281	0	0.418294	0.844495	0	1.05383	0.926221	0	1.01976	-0.245176	0	-0.117517	0.503973	0	0.370563	1.71623	0.0488095	1.63034	-0.667424	0	-0.572033	-0.286039	0	-0.375374	-0.640182	0	-0.635741	0.517594	0	0.580939	0.599319	0.0740741	0.840179	0.898979	0	1.41754	1.60727	0.05	1.74624	0.44949	0.0370879	0.416648
7	Dharmavaram	0.136209	0	0.260025	0.408627	0	0.694128	0.503973	0	0.618835	1.19864	0	1.39606	-0.245176	0	-0.309332	-0.585698	0	-0.682523	-0.326901	0	-0.246208	0.885358	0.0350985	0.963701	-0.531215	0	-0.470891	-0.476731	0	-0.355473	-0.217934	0	-0.116892	-0.599319	0	-0.61951	0	0	-0.104276	0.667424	0	0.897557	0.735528	0	0.886825	-0.14983	0	-0.2307
8	Gooty	-0.245176	0	-0.385108	-0.204313	0	-0.298868	0.830875	0	1.02854	1.96141	0	2.04976	1.08967	0	1.07933	-0.286039	0	-0.305819	0.258797	0	0.118676	0.544836	0	0.526274	-0.939842	-0.0571895	-0.800024	-0.0681045	0	0.0662486	-0.708286	0	-0.760693	0.408627	0	0.561681	-0.0136209	0	0.06861	-0.0817254	0	-0.116914	2.57435	0.111111	2.39375	0	0	0.196459
9	Guntakal	0.204313	0	0.560328	-0.0136209	0	-0.0510507	1.53916	0	1.84374	3.24177	0.0625	3.33706	1.96141	0.047619	2.34572	1.5664	0.0416667	1.71788	1.68899	0.0666667	1.64685	2.35641	0.104356	2.42471	-0.0681045	0	-0.21613	1.10329	0.0434783	1.10437	-0.0544836	0	-0.0664772	-0.46311	0	-0.622019	2.77866	0.456439	2.84777	0.177072	0	0.301348	2.9966	0.163333	3.28409	1.8933	0.2	1.87727
10	Hindupur	-0.0272418	0	-0.0584034	0.231555	0	0.381745	0.844495	0	1.06387	0.626561	0	0.574239	1.97503	0.08	1.9876	-0.395006	0	-0.131838	0.381385	0	0.262878	-0.313281	0	-0.462497	-1.48468	-0.0816667	-1.38015	-0.354143	0	-0.199255	0.272418	0	0.398666	-0.830875	0	-1.0032	0.0272418	0	-0.162476	0.326901	0	0.515806	1.79796	0.106203	1.89634	-0.817254	-0.0930736	-1.03176
11	Kadiri	-0.435869	0	-0.765465	0.0272418	0	0.108684	1.14416	0	1.25373	1.5664	0	1.64667	1.19864	0.0312805	1.52179	0.76277	0	1.09703	-0.46311	0	-0.32991	0.0681045	0	0.107766	-1.21226	-0.070197	-1.42501	0.163451	0	0.374674	0.190693	0	0.107374	-0.258797	0	-0.371852	0.0408627	0	-0.00152289	-0.0817254	0	-0.132877	2.45176	0.114379	2.50232	-0.708286	-0.0769231	-0.769567
12	Kalyanadurg	-0.0817254	0	-0.162371	0.313281	0	0.704894	0.0544836	0	0.0465787	1.07605	0	0.998876	1.40295	0.0571895	1.40831	0.0136209	0	0.084359	0.0817254	0	0.182957	1.86606	0.0588235	2.00434	-0.367764	0	-0.215429	0.108967	0	0.125282	0.503973	0	0.671515	-0.9126	0	-1.19996	1.13053	0.166667	1.31696	0.544836	0	0.859241	2.084	0.0952381	2.68149	0.490352	0.031754	0.700831
13	Kanaganapalle	0.61294	0	1.1782	-0.0408627	0	-0.129714	0.721907	0	0.930068	2.38366	0	2.29805	1.11691	0	1.27094	0.531215	0	0.587206	-0.435869	0	-0.417206	1.67537	0.0714286	1.56392	-0.231555	0	-0.340879	0.190693	0	0.485492	-1.04881	0	-1.03242	-0.776391	0	-0.924118	0.830875	0.113248	0.911513	0.531215	0	0.847602	2.43814	0.107143	2.42792	0.667424	0.0571895	0.884954
14	Kanekal	-0.517594	0	-0.906809	-0.0544836	0	-0.18777	0.286039	0	0.374278	1.10329	0	1.06181	0.136209	0	0.296195	0.354143	0	0.536024	-0.531215	0	-0.337012	1.03519	0.0333704	1.09267	-0.967083	-0.0625	-1.0853	-0.640182	0	-0.393614	0.599319	0	0.818413	-2.01589	0	-2.55383	-0.0681045	0	-0.176372	-0.272418	0	-0.440149	0.572078	0	0.573922	-0.122588	0	-0.0890217
15	Kudair	0.340522	0	0.910533	0.435869	0	1.12358	0.599319	0	1.00513	1.22588	0	1.32881	2.54711	0.0666667	2.67367	0.681045	0	0.643546	0.790012	0	0.772093	1.22588	0.037037	1.3876	-1.10329	-0.05	-1.21894	0.340522	0	0.363907	0.667424	0	0.769358	-1.22588	0	-1.91387	1.55278	0.153947	1.5577	0.790012	0	1.48968	2.92849	0.111111	2.98953	0.354143	0	0.363633
16	Madakasira	0.0817254	0	0.178325	0.163451	0	0.28908	0.46311	0	0.579516	2.23383	0.0555556	2.35818	0.898979	0	0.911522	-0.667424	0	-0.604192	0.326901	0	0.237108	-0.313281	0	-0.297864	-1.83882	-0.111111	-1.83615	0.326901	0	0.604413	0.217934	0	0.25716	-1.13053	0	-1.31939	0.435869	0.0377493	0.409537	0.408627	0	0.666911	2.22021	0.113248	2.27549	-0.858116	-0.114379	-0.830384
17	Mudigubba	0.267615	0	0.676499	0.17841	0	0.286093	0.285456	0	0.40125	0.321139	0	0.357949	0.499549	0	0.680476	0.285456	0	0.298804	-0.249774	0	-0.304553	-0.374662	0	-0.483362	-0.820687	-0.0555556	-0.792602	-0.588754	0	-0.522021	-0.677959	0	-0.630175	1.48081	0	1.86161	0.107046	0	-0.3541	0.463867	0	0.678204	0.945575	0.0344828	0.75482	-0.642277	-0.0909091	-0.674164
18	Pedapappuru	0.499549	0	0.8207	0	0	0	0.874211	0	1.44766	1.35592	0	1.37635	0.909893	0	1.22437	0.356821	0	0.316669	0.892052	0.0384615	0.670523	-1.26671	-0.0769231	-0.953154	-0.249774	0	-0.380731	-0.963416	-0.0714286	-0.902191	-0.0892052	0	-0.102564	0.428185	0	0.587592	-0.0713641	0	-0.0327583	0.499549	0	0.8207	1.92683	0.0909091	1.96832	-0.481708	-0.0714286	-0.404944
19	Penukonda	0.245176	0	0.414465	0.803633	0	1.29966	0	0	0.0769583	0.898979	0	0.835598	0.0953463	0	0.103406	-0.0681045	0	-0.17062	0.858116	0.0151515	1.18523	0.558457	0	0.360962	-0.61294	-0.0435606	-0.662667	-0.408627	0	-0.467499	0.245176	0	0.251442	0.354143	0	0.384997	0.490352	0.0400641	0.515252	1.22588	0	1.55559	0.517594	0	0.756319	0.0272418	0	0.0431909
20	Puttaparthi	0.142728	0	0.28146	0.196251	0	0.372311	0.535231	0	0.696521	1.37376	0	1.27077	0.945575	0.037037	0.815752	-0.249774	0	0.00341494	0.285456	0	0.192697	-1.12398	-0.0833333	-1.18105	-0.321139	0	-0.539687	-1.35592	-0.1	-1.40167	0.0713641	0	0.0837376	0.214092	0	0.317546	-0.624436	-0.142857	-0.545172	0.428185	0	0.62021	1.49865	0.0909091	1.38492	-0.820687	-0.125	-0.618348
21	Rayadurg	-0.558457	0	-1.03904	0.217934	0	0.398084	-0.585698	0	-0.667327	1.14416	0	1.35498	1.34847	0.0526316	1.47056	0.871737	0	0.909679	1.48468	0.047619	1.53001	0.61294	0	0.57144	-0.9126	-0.05	-0.995261	0.14983	0	0.359262	0.14983	0	0.355701	-2.05676	0	-2.55	1.02157	0.142857	0.908875	-0.0817254	0	-0.169539	1.98865	0.0871212	2.30805	0.367764	0.0172414	0.348089
22	Rolla	-0.321139	0	-0.667963	-0.285456	0	-0.538597	0.17841	0	0.177392	0.677959	0	0.781494	0.196251	0	0.201349	0.802846	0.0416667	0.703956	0.017841	0	0.022819	-1.40944	-0.0869565	-1.43228	-0.124887	0	0.0171281	-0.874211	-0.047619	-1.09272	-0.874211	0	-0.774432	-0.6958	0	-0.848442	-0.981257	-0.166667	-0.793269	-0.51739	0	-0.89383	0.588754	0.0434783	0.830028	-0.481708	-0.0588235	-0.348521
23	Singanamala	0.354143	0	0.546167	0.245176	0	0.551459	0.395006	0	0.513461	0.9126	0	1.07905	0.44949	0	0.368852	0.0272418	0	0.0169127	0.0272418	0	0.0483761	1.10329	0.0540936	1.08529	-0.871737	-0.0527778	-0.847689	-1.04881	-0.05	-0.840985	-0.61294	0	-0.664456	-0.381385	0	-0.54954	-0.408627	-0.0490431	-0.389177	0.599319	0	0.745167	1.21226	0.0370879	1.36104	0.136209	0	0.289152
24	Tadimarri	0.499549	0	1.70389	0.481708	0	0.868726	-0.142728	0	-0.196963	1.87331	0	1.93557	0.6958	0	0.988279	1.32024	0	1.17474	0.713641	0	0.616469	-0.356821	0	-0.427369	0.0892052	0	0.0480823	-1.6949	-0.111111	-1.64034	0.196251	0	0.182391	0.677959	0	0.808317	0	0	0.00360054	1.07046	0	1.68643	1.48081	0.0714286	1.78568	0.285456	0	0.259159
25	Tadipatri	-0.286039	0	-0.528798	0.490352	0	0.858248	-0.681045	0	-0.897726	0.435869	0	0.517301	-0.340522	0	-0.518201	-0.44949	0	-0.456899	0.0817254	0	0.228527	-0.340522	0	-0.433583	-0.531215	0	-0.37283	-0.653803	0	-0.788433	0.0544836	0	0.0156488	0.231555	0	0.264387	-1.22588	-0.129167	-1.17624	0.517594	0	0.747914	-0.190693	0	-0.428953	-1.14416	-0.0625	-1.18198
26	Tanakal	0	0	0.0231959	0.408627	0	0.640359	0.735528	0	0.996196	1.87968	0	1.97442	0.858116	0	1.27143	1.26674	0.0357143	1.33239	-0.313281	0	-0.246317	0.953463	0.05	0.919333	-0.599319	0	-0.57364	0.626561	0	0.64067	0.871737	0.0333333	1.02043	-0.231555	0	-0.356749	1.1714	0.166667	1.35915	0.708286	0	0.906663	2.62883	0.0816667	2.81305	0.503973	0.042328	0.521199
27	Uravakonda	-1.04881	0	-1.83398	1.14416	0	2.1874	-0.490352	0	-0.634625	1.28036	0	1.25081	0.9126	0	0.971722	0	0	-0.0592629	-0.776391	-0.0378571	-0.836981	0.14983	0	0.135056	-1.64813	-0.0666667	-1.46211	-0.803633	-0.0363757	-0.648933	-0.231555	0	-0.368096	-1.25312	0	-1.7274	-0.326901	0	-0.439169	0.0272418	0	0.0433998	1.29398	0.0588235	1.18883	-0.994325	-0.0678161	-0.983821
		Siginifact at 90% Confidence Interval
		Siginifact at 95% Confidence Interval
		Siginifact at 99% Confidence Interval
[truncated: 3 more columns]

## Sheet: Total Rainfall vs Rainy Days
Stations	Series	Rainfall totals			Number of rainy days
		MK	SS	SRC	MK	SS	SRC
Anantapur	Summer	1.703	1.825	1.75	0.817254	0.0312805	1.06342
Atmakur	Winter	1.09	0	1.724	1.1714	0	2.01974
Brahmasamudram	North-east monsoon	-1.82	-3.165	-1.705	-2.44422	-0.181818	-2.14687			Siginifact at 90% Confidence Interval
Chennekottapalle	Winter	1.539	0	2.131	0.898979	0	1.41754
Gooty	Summer	2.438	1.811	2.673	2.57435	0.111111	2.39375			Siginifact at 95% Confidence Interval
Guntakal	Annual	1.839	4.805	1.822	2.77866	0.456439	2.84777
Kadiri	Summer	1.444	1.243	1.729	2.45176	0.114379	2.50232			Siginifact at 99% Confidence Interval
Kudair	Winter	1.553	0	2.525	0.790012	0	1.48968
Pedapappuru	Annual	-2.034	-7.648	-2.053	-0.0713641	0	-0.0327583
Pedapappuru	South-west monsoon	-1.82	-4.75	-1.827	-0.481708	-0.0714286	-0.404944
Penukonda	Summer	1.866	1.901	2.08	0.517594	0	0.756319
Puttaparthi	Summer	1.659	1.763	1.716	1.49865	0.0909091	1.38492
Rolla	Annual	-1.606	-7.135	-1.688	-0.981257	-0.166667	-0.793269
Singanamala	North-east monsoon	-2.411	-2.716	-2.221	-1.41657	-0.0769231	-1.35317
Tadimarri	Winter	1.463	0	2.172	1.07046	0	1.68643
Uravakonda	Summer	1.812	1.241	1.961	1.29398	0.0588235	1.18883
Uravakonda	South-west monsoon	-1.703	-3.706	-1.883	-0.994325	-0.0678161	-0.983821

## Sheet: Change Point Analysis
Stations	Series	CUSUM	SQMK
Anantapur	Summer	1995	1998
Atmakur	Winter	2015	-
Brahmasamudram	North-east monsoon	2003	2011
Chennekottapalle	Winter	2012	-
Gooty	Summer	1997	2000
Guntakal	Annual	1995	1995
Kadiri	Summer	1999	1995
Kudair	Winter	2012	-
Pedapappuru	Annual	2001	2011
Pedapappuru	South-west monsoon	2001	2001
Penukonda	Summer	1999	2003
Puttaparthi	Summer	1999	2013
Rolla	Annual	1991	1993
Singanamala	North-east monsoon	2002	2013
Tadimarri	Winter	2012	-
Uravakonda	Summer	2001	2001
Uravakonda	South-west monsoon	2001	2012

## Sheet: Annual-and-Seasonal-Trends
Station name	Annual			Winter			Summer			South-West Monsoon			North-East Monsoon
	MK	SS	SRC	MK	SS	SRC	MK	SS	SRC	MK	SS	SRC	MK	SS	SRC
Amadaguru	-1.07	-3.674	-1.12	0.946	0	1.462	0.946	1.417	1.01	-0.856	-2.552	-0.837	-0.357	-0.933	-0.213
Anantapur	0.15	0.349	0.307	1.158	0	1.473	1.703	1.825	1.75	-0.477	-1.254	-0.338	-0.708	-0.767	-0.745
Atmakur	IH	IH	IH	1.09	0	1.724	IH	IH	IH	IH	IH	IH	0.913	1.008	0.953
Brahmasamudram	-1.534	-5.906	-1.622	0.535	0	0.801	0.999	1.129	1.244	-1.285	-4.447	-1.171	-1.82	-3.165	-1.705
Bukkapatnam	0.15	0.583	0.173	0.15	0	0.295	1.267	0.974	1.569	-0.014	-0.073	0.116	-0.449	-0.787	-0.499
Chennekottapalle	IH	IH	IH	1.539	0	2.131	0.844	0.495	0.746	-0.341	-0.729	-0.278	-0.64	-1.005	-0.797			Siginifact at 90% Confidence Interval
Dharmavaram	0	-0.102	-0.077	0.504	0	0.554	1.171	1.03	1.213	-0.313	-0.827	-0.171	SC	SC	SC
Gooty	-0.218	-0.711	-0.179	0.163	0	0.318	2.438	1.811	2.673	-1.022	-2.051	-0.843	-0.014	-0.007	-0.094			Siginifact at 95% Confidence Interval
Guntakal	1.839	4.805	1.822	1.131	0	1.642	IH	IH	IH	0.613	1.123	0.666	0.804	0.819	0.817
Hindupur	-0.204	-0.675	-0.272	SC	SC	SC	1.566	1.49	1.616	-0.817	-2.299	-0.773	-0.177	-0.176	-0.028			Siginifact at 99% Confidence Interval
Kadiri	-0.259	-0.776	-0.202	-0.014	0	-0.041	1.444	1.243	1.729	-0.286	-1.118	-0.536	0	0.004	0.253
Kalyanadurg	1.076	3.322	1.215	0.395	0	0.729	IH & SC	IH & SC	IH & SC	0.477	0.855	0.633	0	0.06	0.402
Kanaganapalle	0.041	0.124	0.236	1.022	0	1.394	IH	IH	IH	-0.232	-0.578	-0.202	-0.885	-0.894	-0.547
Kanekal	SC	SC	SC	0.095	0	0.231	IH	IH	IH	0.232	0.758	0.283	-0.041	-0.106	-0.317
Kudair	IH	IH	IH	1.553	0	2.525	IH	IH	IH	0.477	0.942	0.573	0.558	0.461	0.528
Madakasira	-0.15	-0.296	-0.187	0.79	0	1.243	1.566	1.726	1.636	-0.422	-0.95	-0.581	0.259	0.467	0.746
Mudigubba	-0.963	-4.74	-0.949	0.553	0	0.783	0.321	0.25	0.301	-1.213	-4.088	-0.974	SC	SC	SC
Pedapappuru	-2.034	-7.648	-2.053	0.517	0	0.633	0.517	0.447	0.656	-1.82	-4.75	-1.827	-1.606	-3.189	-1.449
Penukonda	SC	SC	SC	1.131	0	1.514	1.866	1.901	2.08	SC	SC	SC	0.831	1.166	1.033
Puttaparthi	SC	SC	SC	0.571	0	0.887	1.659	1.763	1.716	-0.285	-1.413	-0.269	-0.731	-1.308	-0.76
Rayadurg	0.667	2.201	0.663	0.313	0	0.512	IH	IH	IH	-0.082	-0.207	-0.078	SC	SC	SC
Rolla	-1.606	-7.135	-1.688	-0.054	0	-0.061	0.178	0.24	0.335	-0.821	-3.933	-0.879	-1.392	-3.3	-1.444
Singanamala	IH	IH	IH	1.158	0	1.465	0	-0.005	-0.041	-1.103	-2.429	-1.032	-2.411	-2.716	-2.221
Tadimarri	-0.285	-1.175	-0.264	1.463	0	2.172	0.821	0.692	1.032	-0.071	-0.117	0.001	SC	SC	SC
Tadipatri	IH	IH	IH	0.64	0	0.852	0.123	0.074	0.139	-0.749	-2.002	-0.678	-0.736	-1.179	-0.826
Tanakal	-0.245	-1.052	-0.211	0.913	0	1.28	0.64	0.504	0.601	-0.504	-1.506	-0.443	-0.667	-0.799	-0.615
Uravakonda	SC	SC	SC	0.613	0	1.011	1.812	1.241	1.961	-1.703	-3.706	-1.883	-1.076	-1.633	-0.934
